# Supplementary material for: The force of the myosin motor sets cooperativity in thin filament activation of skeletal muscles
Source: PubMed Central journal article supplement (PMC9674696; doi:10.1038/s42003-022-04184-0), 2022-11-18
Supplement: 42003_2022_4184_MOESM3_ESM.pdf [file 42003_2022_4184_MOESM3_ESM.pdf]

## **Description of Additional Supplementary Files**

File name: Supplementary Data 1

Description: The source data behind the graphs in the paper.
